# Supplementary material for: Randomized evaluation of decision support interventions for atrial fibrillation: Rationale and design of the RED-AF study
Source: PubMed Central journal article supplement — Am Heart J. Author manuscript; Available in PMC 2024 Aug 27. (PMC11348720; doi:10.1016/j.ahj.2022.02.010), 2022-02-24
Supplement: NIHMS1815291-supplement-Supplemental_Table.pdf [file NIHMS1815291-supplement-Supplemental_Table.pdf]

**Supplemental Table.** Power and sample size calculations for the primary comparisons.<sup>a</sup>

| # | Outcome Measure                  | Max # of Patients per Clinician | Mean # of Patients per Clinician | ICC  | Design effect | <b>Both Patient Decision Aid and Clinician Encounter Aid vs. Control</b> Minimum Detectable Treatment Effects in SD Units |      | Mean Effect Size (in SD units) For Decision Aids in Previous Studies <sup>3</sup> |
|---|----------------------------------|---------------------------------|----------------------------------|------|---------------|---------------------------------------------------------------------------------------------------------------------------|------|-----------------------------------------------------------------------------------|
|   |                                  |                                 |                                  |      |               | 90%                                                                                                                       | 80%  |                                                                                   |
| 1 | OPTION <sup>1</sup>              | 30                              | 5.18                             | 0.25 | 2.85          | 0.46                                                                                                                      | 0.40 | 0.94                                                                              |
| 2 | Decisional Conflict <sup>1</sup> | 30                              | 5.18                             | 0.10 | 1.97          | 0.38                                                                                                                      | 0.33 | 0.33                                                                              |
| 3 | Knowledge <sup>1</sup>           | 30                              | 5.18                             | 0.10 | 1.97          | 0.38                                                                                                                      | 0.33 | 0.42                                                                              |

<sup>a</sup>**Both Patient Decision Aid and Clinician Encounter Decision Aid vs. Usual Care** with a maximum number of patients per clinician of 30 and using intermediate interclass correlation estimates from previous literature;  $\alpha=0.05$  (N = 285 with non-missing outcomes per treatment arm)
